# Supplementary material
Source: publisher site journal article supplement (https://www.spandidos-publications.com/5189/downloadSupplementary)
Supplement: Supplementary file 1 [file downloadSupplementary]

## Sheet: Table S1
Table SI. The list of andrographolide target genes downloaded from Pubchem.
cid	chemicalid	chemicalname	genesymbol	geneid	taxname	taxid	interaction	pmids
5318517	C030419	andrographolide	ABCC4	10257	Mus musculus	10090	[andrographolide co-treated with beta-Naphthoflavone] results in increased expression of ABCC4 mRNA	19737545
5318517	C030419	andrographolide	ACTA2	59	Homo sapiens	9606	andrographolide results in decreased expression of ACTA2 mRNA|andrographolide inhibits the reaction [Acetaminophen results in increased expression of ACTA2 protein]|andrographolide results in decreased expression of ACTA2 protein|andrographolide inhibits the reaction [N-acetyl-4-benzoquinoneimine results in increased expression of ACTA2 mRNA]|NFE2L2 gene mutant form inhibits the reaction [androgr…	29355602
5318517	C030419	andrographolide	ACTA2	59	Homo sapiens	9606	andrographolide inhibits the reaction [Tobacco Smoke Pollution results in increased expression of ACTA2 protein]|IL6 protein promotes the reaction [andrographolide inhibits the reaction [Tobacco Smoke Pollution results in increased expression of ACTA2 protein]]	31128153
5318517	C030419	andrographolide	ACTA2	59	Mus musculus	10090	andrographolide inhibits the reaction [Bleomycin results in increased expression of ACTA2 protein]|andrographolide inhibits the reaction [TGFB1 protein results in increased expression of ACTA2 mRNA]|andrographolide inhibits the reaction [TGFB1 protein results in increased expression of ACTA2 protein]	31706003
5318517	C030419	andrographolide	ADH7	131	Mus musculus	10090	[andrographolide co-treated with beta-Naphthoflavone] results in increased expression of ADH7 mRNA	19737545
5318517	C030419	andrographolide	AKR1C14	105387	Mus musculus	10090	andrographolide results in increased expression of AKR1C14 mRNA|[andrographolide co-treated with beta-Naphthoflavone] results in increased expression of AKR1C14 mRNA	19737545
5318517	C030419	andrographolide	AKR1C19	432720	Mus musculus	10090	andrographolide results in increased expression of AKR1C19 mRNA|[andrographolide co-treated with beta-Naphthoflavone] results in increased expression of AKR1C19 mRNA	19737545
5318517	C030419	andrographolide	ANKRD1	27063	Mus musculus	10090	[andrographolide co-treated with beta-Naphthoflavone] results in decreased expression of ANKRD1 mRNA	19737545
5318517	C030419	andrographolide	AOX3	71724	Mus musculus	10090	[andrographolide co-treated with beta-Naphthoflavone] results in increased expression of AOX3 mRNA	19737545
5318517	C030419	andrographolide	ATF2	1386	Homo sapiens	9606	andrographolide inhibits the reaction [cobaltous chloride results in increased expression of ATF2 protein modified form]|DUSP10 protein promotes the reaction [andrographolide inhibits the reaction [cobaltous chloride results in increased expression of ATF2 protein modified form]]	29165873
5318517	C030419	andrographolide	BAX	581	Homo sapiens	9606	Fluorouracil promotes the reaction [andrographolide affects the folding of BAX protein]|andrographolide affects the folding of BAX protein	19097688
5318517	C030419	andrographolide	BAX	581	Homo sapiens	9606	andrographolide results in increased expression of BAX mRNA|andrographolide promotes the reaction [Cisplatin results in increased expression of BAX protein]|[andrographolide co-treated with Cisplatin] results in increased expression of BAX mRNA	24563380
5318517	C030419	andrographolide	BAX	581	Homo sapiens	9606	andrographolide results in increased expression of BAX protein	23845849|24563380
5318517	C030419	andrographolide	BCL2	596	Homo sapiens	9606	[andrographolide co-treated with Cisplatin] results in decreased expression of BCL2 mRNA	24563380
5318517	C030419	andrographolide	BCL2	596	Homo sapiens	9606	andrographolide results in decreased expression of BCL2 protein	23845849
5318517	C030419	andrographolide	BHMT	635	Mus musculus	10090	[andrographolide co-treated with beta-Naphthoflavone] results in decreased expression of BHMT mRNA	19737545
5318517	C030419	andrographolide	BID	637	Homo sapiens	9606	andrographolide results in increased expression of BID protein|[andrographolide co-treated with Cisplatin] results in increased expression of BID mRNA|andrographolide results in increased expression of BID mRNA	24563380
5318517	C030419	andrographolide	BID	637	Rattus norvegicus	10116	andrographolide promotes the reaction [Penicillamine inhibits the reaction [Copper Sulfate results in decreased expression of and results in increased cleavage of BID protein]]|andrographolide inhibits the reaction [Copper Sulfate results in decreased expression of and results in increased cleavage of BID protein]|Penicillamine promotes the reaction [andrographolide inhibits the reaction [Copper …	20946909
5318517	C030419	andrographolide	BIRC5	332	Homo sapiens	9606	andrographolide results in decreased expression of BIRC5 protein	23845849
5318517	C030419	andrographolide	BLVRB	645	Mus musculus	10090	[andrographolide co-treated with beta-Naphthoflavone] results in increased expression of BLVRB mRNA	19737545
5318517	C030419	andrographolide	CASP3	836	Homo sapiens	9606	[andrographolide co-treated with Cisplatin] results in increased expression of CASP3 mRNA|andrographolide results in increased expression of CASP3 mRNA	24563380
5318517	C030419	andrographolide	CASP3	836	Homo sapiens	9606	CASP8 affects the reaction [Fluorouracil promotes the reaction [andrographolide results in increased activity of CASP3 protein]]|Fluorouracil promotes the reaction [andrographolide results in increased activity of CASP3 protein]|andrographolide results in increased activity of CASP3 protein	19097688
5318517	C030419	andrographolide	CASP3	836	Mus musculus	10090	andrographolide inhibits the reaction [TGFB1 protein results in decreased cleavage of CASP3 protein]	31706003
5318517	C030419	andrographolide	CASP3	836	Rattus norvegicus	10116	andrographolide promotes the reaction [Penicillamine inhibits the reaction [Copper Sulfate results in increased cleavage of CASP3 protein]]|Penicillamine promotes the reaction [andrographolide inhibits the reaction [Copper Sulfate results in increased cleavage of CASP3 protein]]|andrographolide inhibits the reaction [Copper Sulfate results in increased cleavage of CASP3 protein]	20946909
5318517	C030419	andrographolide	CASP8	841	Homo sapiens	9606	[andrographolide co-treated with Cisplatin] results in increased expression of CASP8 mRNA|andrographolide results in increased expression of CASP8 mRNA	24563380
5318517	C030419	andrographolide	CASP8	841	Homo sapiens	9606	andrographolide results in increased activity of CASP8 protein|CASP8 results in increased susceptibility to [andrographolide co-treated with Fluorouracil]|CASP8 affects the reaction [Fluorouracil promotes the reaction [andrographolide results in increased activity of CASP9 protein]]|CASP8 affects the reaction [Fluorouracil promotes the reaction [andrographolide results in increased activity of CA…	19097688
5318517	C030419	andrographolide	CASP8	841	Rattus norvegicus	10116	andrographolide inhibits the reaction [Copper Sulfate results in increased activity of CASP8 protein]	20946909
5318517	C030419	andrographolide	CASP9	842	Homo sapiens	9606	andrographolide results in increased expression of CASP9 mRNA|[andrographolide co-treated with Cisplatin] results in increased expression of CASP9 mRNA	24563380
5318517	C030419	andrographolide	CASP9	842	Homo sapiens	9606	Fluorouracil promotes the reaction [andrographolide results in increased activity of CASP9 protein]|andrographolide results in increased activity of CASP9 protein|CASP8 affects the reaction [Fluorouracil promotes the reaction [andrographolide results in increased activity of CASP9 protein]]	19097688
5318517	C030419	andrographolide	CASP9	842	Rattus norvegicus	10116	andrographolide inhibits the reaction [Copper Sulfate results in increased activity of CASP9 protein]|andrographolide promotes the reaction [Penicillamine inhibits the reaction [Copper Sulfate results in increased activity of CASP9 protein]]|Penicillamine promotes the reaction [andrographolide inhibits the reaction [Copper Sulfate results in increased activity of CASP9 protein]]	20946909
5318517	C030419	andrographolide	CAT	847	Mus musculus	10090	andrographolide inhibits the reaction [sodium arsenite results in decreased activity of CAT protein]|[andrographolide co-treated with Polylactic Acid-Polyglycolic Acid Copolymer] inhibits the reaction [sodium arsenite results in decreased activity of CAT protein]	26485141
5318517	C030419	andrographolide	CAT	847	Rattus norvegicus	10116	andrographolide inhibits the reaction [Freund's Adjuvant results in decreased activity of CAT protein]	32061742
5318517	C030419	andrographolide	CBR1	873	Mus musculus	10090	[andrographolide co-treated with beta-Naphthoflavone] results in increased expression of CBR1 mRNA	19737545
5318517	C030419	andrographolide	CBR3	874	Mus musculus	10090	[andrographolide co-treated with beta-Naphthoflavone] results in increased expression of CBR3 mRNA|andrographolide results in increased expression of CBR3 mRNA	19737545
5318517	C030419	andrographolide	CCL2	6347	Mus musculus	10090	[andrographolide co-treated with beta-Naphthoflavone] results in decreased expression of CCL2 mRNA	19737545
5318517	C030419	andrographolide	CCN2	1490	Mus musculus	10090	[andrographolide co-treated with beta-Naphthoflavone] results in decreased expression of CCN2 mRNA	19737545
5318517	C030419	andrographolide	CCNA2	890	Homo sapiens	9606	andrographolide inhibits the reaction [CCNA2 protein binds to CDK2 protein]|andrographolide results in decreased expression of CCNA2 protein	18619950
5318517	C030419	andrographolide	CCND1	595	Homo sapiens	9606	andrographolide inhibits the reaction [CCND1 protein binds to CDK4 protein]	18619950
5318517	C030419	andrographolide	CCND1	595	Homo sapiens	9606	andrographolide results in decreased expression of CCND1 protein	18619950|23845849
5318517	C030419	andrographolide	CCNE1	898	Homo sapiens	9606	andrographolide results in decreased expression of CCNE1 protein	23845849
5318517	C030419	andrographolide	CCNE1	898	Mus musculus	10090	andrographolide inhibits the reaction [[1-Methyl-3-isobutylxanthine co-treated with Dexamethasone co-treated with INS1 protein] results in increased expression of CCNE1 protein]	27475717
5318517	C030419	andrographolide	CDH1	999	Homo sapiens	9606	IL6 protein promotes the reaction [andrographolide inhibits the reaction [Tobacco Smoke Pollution results in decreased expression of CDH1 protein]]|andrographolide inhibits the reaction [Tobacco Smoke Pollution results in decreased expression of CDH1 protein]	31128153
5318517	C030419	andrographolide	CDH17	1015	Mus musculus	10090	[andrographolide co-treated with beta-Naphthoflavone] results in decreased expression of CDH17 mRNA|andrographolide results in decreased expression of CDH17 mRNA	19737545
5318517	C030419	andrographolide	CDH2	1000	Homo sapiens	9606	andrographolide inhibits the reaction [Tobacco Smoke Pollution results in increased expression of CDH2 protein]|IL6 protein promotes the reaction [andrographolide inhibits the reaction [Tobacco Smoke Pollution results in increased expression of CDH2 protein]]	31128153
5318517	C030419	andrographolide	CDK2	1017	Homo sapiens	9606	andrographolide inhibits the reaction [CCNA2 protein binds to CDK2 protein]|andrographolide results in decreased expression of CDK2 protein	18619950
5318517	C030419	andrographolide	CDK2	1017	Mus musculus	10090	andrographolide inhibits the reaction [[1-Methyl-3-isobutylxanthine co-treated with Dexamethasone co-treated with INS1 protein] results in increased expression of CDK2 protein]	27475717
5318517	C030419	andrographolide	CDK4	1019	Homo sapiens	9606	andrographolide inhibits the reaction [CCND1 protein binds to CDK4 protein]|andrographolide results in decreased expression of CDK4 protein	18619950
5318517	C030419	andrographolide	CDKN1A	1026	Homo sapiens	9606	andrographolide results in increased expression of CDKN1A protein	18619950|23845849
5318517	C030419	andrographolide	CEBPA	1050	Mus musculus	10090	andrographolide inhibits the reaction [[1-Methyl-3-isobutylxanthine co-treated with Dexamethasone co-treated with INS1 protein] results in increased expression of CEBPA protein]|andrographolide affects the reaction [[1-Methyl-3-isobutylxanthine co-treated with Dexamethasone co-treated with INS1 protein] affects the expression of CEBPA mRNA]	27475717
5318517	C030419	andrographolide	CEBPB	1051	Mus musculus	10090	andrographolide inhibits the reaction [[1-Methyl-3-isobutylxanthine co-treated with Dexamethasone co-treated with INS1 protein] results in increased expression of and results in increased phosphorylation of CEBPB protein]|andrographolide affects the reaction [[1-Methyl-3-isobutylxanthine co-treated with Dexamethasone co-treated with INS1 protein] affects the expression of CEBPB mRNA]	27475717
5318517	C030419	andrographolide	CES3	23491	Mus musculus	10090	andrographolide results in increased expression of CES3 mRNA|[andrographolide co-treated with beta-Naphthoflavone] results in increased expression of CES3 mRNA	19737545
5318517	C030419	andrographolide	CISH	1154	Mus musculus	10090	[andrographolide co-treated with beta-Naphthoflavone] results in decreased expression of CISH mRNA	19737545
5318517	C030419	andrographolide	CNN2	1265	Mus musculus	10090	[andrographolide co-treated with beta-Naphthoflavone] results in decreased expression of CNN2 mRNA	19737545
5318517	C030419	andrographolide	COL1A1	1277	Homo sapiens	9606	andrographolide inhibits the reaction [Acetaminophen results in increased expression of COL1A1 mRNA]|andrographolide results in decreased expression of COL1A1 mRNA|andrographolide inhibits the reaction [N-acetyl-4-benzoquinoneimine results in increased expression of COL1A1 mRNA]	29355602
5318517	C030419	andrographolide	COL1A1	1277	Mus musculus	10090	andrographolide inhibits the reaction [TGFB1 protein results in increased expression of COL1A1 mRNA]	31706003
5318517	C030419	andrographolide	COL1A2	1278	Homo sapiens	9606	andrographolide inhibits the reaction [Acetaminophen results in increased expression of COL1A2 mRNA]|andrographolide results in decreased expression of COL1A2 mRNA	29355602
5318517	C030419	andrographolide	COL3A1	1281	Homo sapiens	9606	andrographolide inhibits the reaction [Acetaminophen results in increased expression of COL3A1 mRNA]|andrographolide results in decreased expression of COL3A1 mRNA|andrographolide inhibits the reaction [N-acetyl-4-benzoquinoneimine results in increased expression of COL3A1 mRNA]	29355602
5318517	C030419	andrographolide	COL3A1	1281	Mus musculus	10090	andrographolide inhibits the reaction [TGFB1 protein results in increased expression of COL3A1 mRNA]|andrographolide inhibits the reaction [TGFB1 protein results in increased expression of COL3A1 protein]	31706003
5318517	C030419	andrographolide	CRCT1	54544	Mus musculus	10090	[andrographolide co-treated with beta-Naphthoflavone] results in decreased expression of CRCT1 mRNA	19737545
5318517	C030419	andrographolide	CXCL13	10563	Mus musculus	10090	[andrographolide co-treated with beta-Naphthoflavone] results in decreased expression of CXCL13 mRNA	19737545
5318517	C030419	andrographolide	CXCL2	2920	Rattus norvegicus	10116	andrographolide inhibits the reaction [Freund's Adjuvant results in increased expression of CXCL2 protein]	32061742
5318517	C030419	andrographolide	CXCL8	3576	Mus musculus	10090	andrographolide inhibits the reaction [Tobacco Smoke Pollution results in increased secretion of CXCL8 protein]|andrographolide inhibits the reaction [Tobacco Smoke Pollution results in increased expression of CXCL8 mRNA]	31128153
5318517	C030419	andrographolide	CYP17A1	1586	Mus musculus	10090	[andrographolide co-treated with beta-Naphthoflavone] results in decreased expression of CYP17A1 mRNA	19737545
5318517	C030419	andrographolide	CYP1A1	1543	Mus musculus	10090	Acetylcysteine affects the reaction [andrographolide affects the reaction [beta-Naphthoflavone results in increased expression of CYP1A1 mRNA]]|Hydrogen Peroxide promotes the reaction [andrographolide affects the reaction [beta-Naphthoflavone results in increased expression of CYP1A1 mRNA]]|Buthionine Sulfoximine promotes the reaction [andrographolide affects the reaction [beta-Naphthoflavone res…	21094198
5318517	C030419	andrographolide	CYP1A1	1543	Mus musculus	10090	Resveratrol inhibits the reaction [[andrographolide co-treated with benz(a)anthracene] results in increased expression of CYP1A1 mRNA]|[andrographolide co-treated with beta-Naphthoflavone] results in increased expression of CYP1A1 mRNA|[andrographolide co-treated with Tetrachlorodibenzodioxin] results in increased expression of CYP1A1 mRNA|[andrographolide co-treated with benz(a)anthracene] resul…	17825862
5318517	C030419	andrographolide	CYP1A1	1543	Mus musculus	10090	andrographolide promotes the reaction [beta-Naphthoflavone results in increased expression of CYP1A1 mRNA]	19737545
5318517	C030419	andrographolide	CYP1A1	1543	Mus musculus	10090	andrographolide results in increased activity of CYP1A1 protein	17825862|21094198
5318517	C030419	andrographolide	CYP1A1	1543	Mus musculus	10090	andrographolide results in increased expression of CYP1A1 mRNA	17825862|19737545|21094198|21963808
5318517	C030419	andrographolide	CYP1A1	1543	Mus musculus	10090	beta-Naphthoflavone promotes the reaction [andrographolide results in increased expression of CYP1A1 mRNA]	21963808
5318517	C030419	andrographolide	CYP1A2	1544	Homo sapiens	9606	andrographolide results in decreased expression of CYP1A2 mRNA|andrographolide results in increased expression of CYP1A2 mRNA	19041297
5318517	C030419	andrographolide	CYP1A2	1544	Mus musculus	10090	[andrographolide co-treated with benz(a)anthracene] results in increased expression of CYP1A2 mRNA|andrographolide results in increased expression of CYP1A2 mRNA	17825862
5318517	C030419	andrographolide	CYP1A2	1544	Mus musculus	10090	[andrographolide co-treated with beta-Naphthoflavone] results in increased expression of CYP1A2 mRNA	19737545
5318517	C030419	andrographolide	CYP1A2	1544	Rattus norvegicus	10116	andrographolide affects the reaction [CYP1A2 protein results in increased metabolism of Theophylline]	20096675
5318517	C030419	andrographolide	CYP1B1	1545	Mus musculus	10090	[andrographolide co-treated with benz(a)anthracene] results in increased expression of CYP1B1 mRNA	17825862
5318517	C030419	andrographolide	CYP1B1	1545	Mus musculus	10090	andrographolide promotes the reaction [beta-Naphthoflavone results in increased expression of CYP1B1 mRNA]	19737545
5318517	C030419	andrographolide	CYP2A4	13086	Mus musculus	10090	andrographolide results in increased expression of CYP2A4 mRNA|beta-Naphthoflavone promotes the reaction [andrographolide results in increased expression of CYP2A4 mRNA]	19737545
5318517	C030419	andrographolide	CYP2B10	13088	Mus musculus	10090	[andrographolide co-treated with beta-Naphthoflavone] results in increased expression of CYP2B10 mRNA|andrographolide results in increased expression of CYP2B10 mRNA	19737545
5318517	C030419	andrographolide	CYP2B10	13088	Mus musculus	10090	andrographolide results in increased activity of CYP2B10 protein	21094198
5318517	C030419	andrographolide	CYP2B9	13094	Mus musculus	10090	[andrographolide co-treated with beta-Naphthoflavone] results in increased expression of CYP2B9 mRNA|andrographolide results in increased expression of CYP2B9 mRNA	19737545
5318517	C030419	andrographolide	CYP2C11	29277	Rattus norvegicus	10116	andrographolide results in decreased expression of CYP2C11 protein|andrographolide results in decreased expression of CYP2C11 mRNA	19041297
5318517	C030419	andrographolide	CYP2C9	1559	Homo sapiens	9606	andrographolide results in decreased expression of CYP2C9 mRNA	19041297
5318517	C030419	andrographolide	CYP3A11	13112	Mus musculus	10090	[andrographolide co-treated with beta-Naphthoflavone] results in increased expression of CYP3A11 mRNA	19737545
5318517	C030419	andrographolide	CYP3A23-3A1	25642	Rattus norvegicus	10116	andrographolide results in decreased expression of CYP3A23-3A1 mRNA	19041297
5318517	C030419	andrographolide	CYP3A4	1576	Homo sapiens	9606	andrographolide results in decreased expression of CYP3A4 mRNA	19041297
5318517	C030419	andrographolide	CYP8B1	1582	Mus musculus	10090	andrographolide results in increased expression of CYP8B1 mRNA	19737545
5318517	C030419	andrographolide	DDC	1644	Mus musculus	10090	[andrographolide co-treated with beta-Naphthoflavone] results in increased expression of DDC mRNA|andrographolide results in increased expression of DDC mRNA	19737545
5318517	C030419	andrographolide	DUSP10	11221	Homo sapiens	9606	andrographolide results in increased expression of DUSP10 mRNA|DUSP10 protein promotes the reaction [andrographolide inhibits the reaction [cobaltous chloride results in increased expression of HIF1A mRNA]]|zinc protoporphyrin inhibits the reaction [andrographolide results in increased expression of DUSP10 mRNA]|andrographolide results in increased expression of DUSP10 protein|1H-(1,2,4)oxadiazol…	29165873
5318517	C030419	andrographolide	EDN1	1906	Homo sapiens	9606	andrographolide inhibits the reaction [cobaltous chloride results in increased expression of EDN1 mRNA]	27297870|29165873
5318517	C030419	andrographolide	EDN1	1906	Homo sapiens	9606	andrographolide inhibits the reaction [cobaltous chloride results in increased expression of EDN1 protein]|Vanadates inhibits the reaction [andrographolide inhibits the reaction [cobaltous chloride results in increased expression of EDN1 mRNA]]|Vanadates inhibits the reaction [andrographolide inhibits the reaction [cobaltous chloride results in increased expression of EDN1 protein]]	29165873
5318517	C030419	andrographolide	EGLN1	54583	Homo sapiens	9606	EGLN1 mutant form inhibits the reaction [andrographolide results in decreased expression of HIF1A protein]|TGFB1 protein inhibits the reaction [andrographolide results in increased expression of EGLN1 protein]|TGFB1 protein inhibits the reaction [andrographolide results in increased expression of EGLN1 mRNA]|EGLN1 mutant form inhibits the reaction [andrographolide results in decreased expression …	21134392
5318517	C030419	andrographolide	EGLN1	54583	Homo sapiens	9606	andrographolide results in increased expression of EGLN1 protein	21134392|27297870
5318517	C030419	andrographolide	EGLN3	112399	Homo sapiens	9606	andrographolide results in increased expression of EGLN3 protein	27297870
5318517	C030419	andrographolide	EID3	493861	Mus musculus	10090	[andrographolide co-treated with beta-Naphthoflavone] results in increased expression of EID3 mRNA	19737545
5318517	C030419	andrographolide	ELANE	1991	Rattus norvegicus	10116	andrographolide inhibits the reaction [Freund's Adjuvant results in increased expression of ELANE protein]	32061742
5318517	C030419	andrographolide	EZH2	2146	Homo sapiens	9606	IL6 protein promotes the reaction [andrographolide inhibits the reaction [Tobacco Smoke Pollution results in increased expression of EZH2 protein]]|andrographolide inhibits the reaction [Tobacco Smoke Pollution results in increased expression of EZH2 protein]	31128153
5318517	C030419	andrographolide	FAS	355	Homo sapiens	9606	[andrographolide co-treated with Cisplatin] results in increased expression of FAS mRNA|[andrographolide co-treated with Cisplatin] results in increased expression of FAS protein|andrographolide results in increased expression of FAS protein|[andrographolide co-treated with Cisplatin] promotes the reaction [FAS protein binds to FASLG protein]|andrographolide results in increased expression of FAS…	24563380
5318517	C030419	andrographolide	FASLG	356	Homo sapiens	9606	[andrographolide co-treated with Cisplatin] promotes the reaction [FAS protein binds to FASLG protein]|andrographolide results in increased expression of FASLG mRNA|[andrographolide co-treated with Cisplatin] results in increased expression of FASLG mRNA|[andrographolide co-treated with Cisplatin] results in increased expression of FASLG protein|andrographolide promotes the reaction [FAS protein …	24563380
5318517	C030419	andrographolide	FASN	2194	Mus musculus	10090	andrographolide inhibits the reaction [[1-Methyl-3-isobutylxanthine co-treated with Dexamethasone co-treated with INS1 protein] results in increased expression of FASN mRNA]|andrographolide inhibits the reaction [[1-Methyl-3-isobutylxanthine co-treated with Dexamethasone co-treated with INS1 protein] results in increased expression of FASN protein]	27475717
5318517	C030419	andrographolide	FLT1	2321	Homo sapiens	9606	andrographolide results in decreased expression of FLT1 mRNA	28651835
5318517	C030419	andrographolide	FN1	2335	Mus musculus	10090	andrographolide inhibits the reaction [TGFB1 protein results in increased expression of FN1 protein]	31706003
5318517	C030419	andrographolide	FOS	2353	Homo sapiens	9606	andrographolide results in decreased localization of and results in decreased activity of FOS protein	19426720
5318517	C030419	andrographolide	GCLC	2729	Homo sapiens	9606	andrographolide inhibits the reaction [Acetaminophen results in decreased expression of GCLC mRNA]|andrographolide results in increased expression of GCLC protein	29355602
5318517	C030419	andrographolide	GCLC	2729	Rattus norvegicus	10116	andrographolide results in increased expression of GCLC mRNA	25110055
5318517	C030419	andrographolide	GCLC	2729	Rattus norvegicus	10116	andrographolide results in increased expression of GCLC protein	25110055|29355602
5318517	C030419	andrographolide	GCLM	2730	Homo sapiens	9606	andrographolide inhibits the reaction [Acetaminophen results in decreased expression of GCLM mRNA]|andrographolide results in increased expression of GCLM protein	29355602
5318517	C030419	andrographolide	GCLM	2730	Mus musculus	10090	[andrographolide co-treated with beta-Naphthoflavone] results in increased expression of GCLM mRNA	19737545
5318517	C030419	andrographolide	GCLM	2730	Rattus norvegicus	10116	andrographolide results in increased expression of GCLM mRNA	25110055
5318517	C030419	andrographolide	GCLM	2730	Rattus norvegicus	10116	andrographolide results in increased expression of GCLM protein	25110055|29355602
5318517	C030419	andrographolide	GPT	2875	Mus musculus	10090	[Polylactic Acid-Polyglycolic Acid Copolymer co-treated with andrographolide] inhibits the reaction [sodium arsenite results in increased activity of GPT protein]	26485141
5318517	C030419	andrographolide	GSK3B	2932	Mus musculus	10090	andrographolide inhibits the reaction [[1-Methyl-3-isobutylxanthine co-treated with Dexamethasone co-treated with INS1 protein] results in increased phosphorylation of GSK3B protein]	27475717
5318517	C030419	andrographolide	GSR	2936	Rattus norvegicus	10116	andrographolide results in increased activity of GSR protein	25110055
5318517	C030419	andrographolide	GSTM2	2946	Mus musculus	10090	[andrographolide co-treated with beta-Naphthoflavone] results in increased expression of GSTM2 mRNA	19737545
5318517	C030419	andrographolide	GSTM3	2947	Mus musculus	10090	[andrographolide co-treated with beta-Naphthoflavone] results in increased expression of GSTM3 mRNA|andrographolide results in increased expression of GSTM3 mRNA	19737545
5318517	C030419	andrographolide	GSTM4	2948	Mus musculus	10090	andrographolide results in increased expression of GSTM4 mRNA|[andrographolide co-treated with beta-Naphthoflavone] results in increased expression of GSTM4 mRNA	19737545
5318517	C030419	andrographolide	HDAC1	3065	Homo sapiens	9606	andrographolide results in decreased expression of HDAC1 protein	28651835
5318517	C030419	andrographolide	HIF1A	3091	Homo sapiens	9606	andrographolide results in decreased expression of and affects the localization of HIF1A protein|andrographolide results in decreased expression of HIF1A protein|pyrazolanthrone inhibits the reaction [andrographolide results in decreased expression of HIF1A protein]|[andrographolide co-treated with benzyloxycarbonylleucyl-leucyl-leucine aldehyde] results in increased ubiquitination of HIF1A prote…	28651835
5318517	C030419	andrographolide	HIF1A	3091	Homo sapiens	9606	NFE2L2 protein affects the reaction [andrographolide inhibits the reaction [cobaltous chloride results in increased expression of HIF1A mRNA]]|[andrographolide co-treated with cobaltous chloride] results in increased hydroxylation of HIF1A protein|HMOX1 protein affects the reaction [andrographolide inhibits the reaction [cobaltous chloride results in increased expression of HIF1A mRNA]]	27297870
5318517	C030419	andrographolide	HIF1A	3091	Homo sapiens	9606	andrographolide inhibits the reaction [cobaltous chloride results in increased expression of HIF1A mRNA]	27297870|29165873
5318517	C030419	andrographolide	HIF1A	3091	Homo sapiens	9606	DUSP10 protein promotes the reaction [andrographolide inhibits the reaction [cobaltous chloride results in increased expression of HIF1A mRNA]]|Vanadates inhibits the reaction [andrographolide inhibits the reaction [cobaltous chloride results in increased expression of HIF1A protein]]|andrographolide inhibits the reaction [cobaltous chloride results in increased expression of HIF1A protein]|Vanad…	29165873
5318517	C030419	andrographolide	HIF1A	3091	Homo sapiens	9606	EGLN1 mutant form inhibits the reaction [andrographolide results in decreased expression of HIF1A protein]|andrographolide results in increased expression of HIF1A protein modified form|andrographolide inhibits the reaction [HIF1A protein binds to VEGFA promoter]|andrographolide results in decreased expression of and results in increased degradation of HIF1A protein|benzyloxycarbonylleucyl-leucyl…	21134392
5318517	C030419	andrographolide	HMOX1	3162	Homo sapiens	9606	andrographolide results in increased expression of HMOX1 protein	29165873|29355602
5318517	C030419	andrographolide	HMOX1	3162	Homo sapiens	9606	HMOX1 protein affects the reaction [andrographolide inhibits the reaction [cobaltous chloride results in increased expression of HIF1A mRNA]]	27297870
5318517	C030419	andrographolide	HMOX1	3162	Homo sapiens	9606	HMOX1 protein promotes the reaction [andrographolide results in increased expression of DUSP10 protein]	29165873
5318517	C030419	andrographolide	HMOX1	3162	Mus musculus	10090	andrographolide results in increased expression of HMOX1 protein|andrographolide inhibits the reaction [Acetaminophen results in decreased expression of HMOX1 mRNA]	29355602
5318517	C030419	andrographolide	HMOX1	3162	Rattus norvegicus	10116	andrographolide results in increased expression of HMOX1 mRNA	25110055
5318517	C030419	andrographolide	HMOX1	3162	Rattus norvegicus	10116	andrographolide results in increased expression of HMOX1 protein	25110055|29355602
5318517	C030419	andrographolide	HOTAIR	100124700	Homo sapiens	9606	andrographolide inhibits the reaction [Tobacco Smoke Pollution results in increased expression of HOTAIR mRNA]|IL6 protein promotes the reaction [andrographolide inhibits the reaction [Tobacco Smoke Pollution results in increased expression of HOTAIR mRNA]]	31128153
5318517	C030419	andrographolide	HP	3240	Mus musculus	10090	[andrographolide co-treated with beta-Naphthoflavone] results in decreased expression of HP mRNA	19737545
5318517	C030419	andrographolide	HPGD	3248	Mus musculus	10090	[andrographolide co-treated with beta-Naphthoflavone] results in increased expression of HPGD mRNA	19737545
5318517	C030419	andrographolide	IKBKE	9641	Mus musculus	10090	[andrographolide co-treated with beta-Naphthoflavone] results in decreased expression of IKBKE mRNA	19737545
5318517	C030419	andrographolide	IL6	3569	Homo sapiens	9606	IL6 protein promotes the reaction [andrographolide inhibits the reaction [Tobacco Smoke Pollution results in increased expression of ACTA2 protein]]|IL6 protein promotes the reaction [andrographolide inhibits the reaction [Tobacco Smoke Pollution results in increased expression of HOTAIR mRNA]]|IL6 protein promotes the reaction [andrographolide inhibits the reaction [Tobacco Smoke Pollution resul…	31128153
5318517	C030419	andrographolide	IL6	3569	Rattus norvegicus	10116	andrographolide inhibits the reaction [Freund's Adjuvant results in increased expression of IL6 protein]	32061742
5318517	C030419	andrographolide	INS1	16333	Mus musculus	10090	andrographolide inhibits the reaction [[1-Methyl-3-isobutylxanthine co-treated with Dexamethasone co-treated with INS1 protein] results in increased expression of and results in increased phosphorylation of CEBPB protein]|andrographolide inhibits the reaction [[1-Methyl-3-isobutylxanthine co-treated with Dexamethasone co-treated with INS1 protein] results in increased expression of SCD1 protein]|…	27475717
5318517	C030419	andrographolide	JUN	3725	Homo sapiens	9606	andrographolide results in decreased localization of and results in decreased activity of JUN protein	19426720
5318517	C030419	andrographolide	KDR	3791	Homo sapiens	9606	andrographolide inhibits the reaction [VEGFA protein results in increased phosphorylation of KDR protein]|[andrographolide co-treated with KDR protein] inhibits the reaction [VEGFA protein binds to KDR protein]	24814888
5318517	C030419	andrographolide	KDR	3791	Homo sapiens	9606	andrographolide results in decreased expression of KDR mRNA	28651835
5318517	C030419	andrographolide	KEAP1	9817	Homo sapiens	9606	andrographolide results in decreased expression of KEAP1 protein	29355602
5318517	C030419	andrographolide	KRT5	3852	Mus musculus	10090	[andrographolide co-treated with beta-Naphthoflavone] results in increased expression of KRT5 mRNA	19737545
5318517	C030419	andrographolide	LTB4DH	493462	Mus musculus	10090	[andrographolide co-treated with beta-Naphthoflavone] results in increased expression of LTB4DH mRNA	19737545
5318517	C030419	andrographolide	MAP2K4	6416	Homo sapiens	9606	andrographolide inhibits the reaction [VEGFA protein results in increased phosphorylation of MAP2K4 protein]	24814888
5318517	C030419	andrographolide	MAP2K6	5608	Homo sapiens	9606	andrographolide inhibits the reaction [VEGFA protein results in increased phosphorylation of MAP2K6 protein]	24814888
5318517	C030419	andrographolide	MAP2K7	5609	Homo sapiens	9606	andrographolide inhibits the reaction [VEGFA protein results in increased phosphorylation of MAP2K7 protein]	24814888
5318517	C030419	andrographolide	MAP3K5	4217	Homo sapiens	9606	andrographolide inhibits the reaction [VEGFA protein results in increased phosphorylation of MAP3K5 protein]	24814888
5318517	C030419	andrographolide	MAPK1	5594	Homo sapiens	9606	andrographolide inhibits the reaction [VEGFA protein results in increased phosphorylation of MAPK1 protein]	24814888
5318517	C030419	andrographolide	MAPK1	5594	Mus musculus	10090	andrographolide inhibits the reaction [[1-Methyl-3-isobutylxanthine co-treated with Dexamethasone co-treated with INS1 protein] results in increased phosphorylation of MAPK1 protein]	27475717
5318517	C030419	andrographolide	MAPK1	5594	Mus musculus	10090	andrographolide inhibits the reaction [TGFB1 protein results in increased phosphorylation of MAPK1 protein]	31706003
5318517	C030419	andrographolide	MAPK3	5595	Homo sapiens	9606	andrographolide inhibits the reaction [VEGFA protein results in increased phosphorylation of MAPK3 protein]	24814888
5318517	C030419	andrographolide	MAPK3	5595	Mus musculus	10090	andrographolide inhibits the reaction [[1-Methyl-3-isobutylxanthine co-treated with Dexamethasone co-treated with INS1 protein] results in increased phosphorylation of MAPK3 protein]	27475717
5318517	C030419	andrographolide	MAPK3	5595	Mus musculus	10090	andrographolide inhibits the reaction [TGFB1 protein results in increased phosphorylation of MAPK3 protein]	31706003
5318517	C030419	andrographolide	MMP2	4313	Mus musculus	10090	andrographolide inhibits the reaction [TGFB1 protein results in increased expression of MMP2 mRNA]	31706003
5318517	C030419	andrographolide	MMP7	4316	Homo sapiens	9606	andrographolide results in decreased expression of MMP7 mRNA|andrographolide results in decreased expression of and results in decreased activity of MMP7 protein	19426720
5318517	C030419	andrographolide	MMP9	4318	Mus musculus	10090	andrographolide inhibits the reaction [TGFB1 protein results in increased expression of MMP9 mRNA]	31706003
5318517	C030419	andrographolide	MPO	4353	Rattus norvegicus	10116	andrographolide inhibits the reaction [Freund's Adjuvant results in increased expression of MPO protein]	32061742
5318517	C030419	andrographolide	MTA1	9112	Homo sapiens	9606	andrographolide results in decreased expression of MTA1 mRNA|andrographolide results in decreased expression of MTA1 protein	28651835
5318517	C030419	andrographolide	MYO18B	84700	Mus musculus	10090	andrographolide results in decreased expression of MYO18B mRNA	19737545
5318517	C030419	andrographolide	NECAB1	64168	Mus musculus	10090	[andrographolide co-treated with beta-Naphthoflavone] results in increased expression of NECAB1 mRNA	19737545
5318517	C030419	andrographolide	NFE2L2	4780	Homo sapiens	9606	NFE2L2 protein affects the reaction [andrographolide inhibits the reaction [cobaltous chloride results in increased expression of HIF1A mRNA]]	27297870
5318517	C030419	andrographolide	NFE2L2	4780	Mus musculus	10090	NFE2L2 gene mutant form results in decreased susceptibility to andrographolide|NFE2L2 gene mutant form inhibits the reaction [andrographolide inhibits the reaction [Acetaminophen results in increased expression of ACTA2 protein]]	29355602
5318517	C030419	andrographolide	NFE2L2	4780	Rattus norvegicus	10116	andrographolide results in increased activity of NFE2L2 protein	25110055
5318517	C030419	andrographolide	NGB	58157	Mus musculus	10090	[andrographolide co-treated with beta-Naphthoflavone] results in decreased expression of NGB mRNA	19737545
5318517	C030419	andrographolide	NQO1	1728	Homo sapiens	9606	andrographolide results in increased expression of NQO1 protein|andrographolide promotes the reaction [Acetaminophen results in increased expression of NQO1 mRNA]	29355602
5318517	C030419	andrographolide	NQO1	1728	Mus musculus	10090	[andrographolide co-treated with beta-Naphthoflavone] results in increased expression of NQO1 mRNA|andrographolide results in increased expression of NQO1 mRNA	19737545
5318517	C030419	andrographolide	OR6C8	258315	Mus musculus	10090	andrographolide results in decreased expression of OR6C8 mRNA	19737545
5318517	C030419	andrographolide	PCNA	5111	Mus musculus	10090	andrographolide inhibits the reaction [TGFB1 protein results in increased expression of PCNA protein]	31706003
5318517	C030419	andrographolide	PDZRN3	23024	Mus musculus	10090	[andrographolide co-treated with beta-Naphthoflavone] results in decreased expression of PDZRN3 mRNA	19737545
5318517	C030419	andrographolide	PECAM1	5175	Homo sapiens	9606	andrographolide results in decreased expression of PECAM1 protein	28651835
5318517	C030419	andrographolide	PHOSPHO1	162466	Mus musculus	10090	[andrographolide co-treated with beta-Naphthoflavone] results in increased expression of PHOSPHO1 mRNA	19737545
5318517	C030419	andrographolide	PLSCR1	5359	Mus musculus	10090	[andrographolide co-treated with beta-Naphthoflavone] results in decreased expression of PLSCR1 mRNA	19737545
5318517	C030419	andrographolide	POR	5447	Mus musculus	10090	[andrographolide co-treated with beta-Naphthoflavone] results in increased expression of POR mRNA	19737545
5318517	C030419	andrographolide	PPARG	5468	Mus musculus	10090	andrographolide inhibits the reaction [[1-Methyl-3-isobutylxanthine co-treated with Dexamethasone co-treated with INS1 protein] results in increased expression of PPARG protein]	27475717
5318517	C030419	andrographolide	RAF1	5894	Homo sapiens	9606	andrographolide inhibits the reaction [VEGFA protein results in increased phosphorylation of RAF1 protein]	24814888
5318517	C030419	andrographolide	RB1	5925	Homo sapiens	9606	andrographolide results in decreased phosphorylation of RB1 protein	18619950
5318517	C030419	andrographolide	S100A4	6275	Rattus norvegicus	10116	andrographolide inhibits the reaction [Bleomycin results in increased expression of S100A4 protein]	31706003
5318517	C030419	andrographolide	SBPL	638345	Mus musculus	10090	[andrographolide co-treated with beta-Naphthoflavone] results in decreased expression of SBPL mRNA|andrographolide results in decreased expression of SBPL mRNA	19737545
5318517	C030419	andrographolide	SCD1	20249	Mus musculus	10090	andrographolide inhibits the reaction [[1-Methyl-3-isobutylxanthine co-treated with Dexamethasone co-treated with INS1 protein] results in increased expression of SCD1 protein]|andrographolide inhibits the reaction [[1-Methyl-3-isobutylxanthine co-treated with Dexamethasone co-treated with INS1 protein] results in increased expression of SCD1 mRNA]	27475717
5318517	C030419	andrographolide	SERPINA7	6906	Mus musculus	10090	[andrographolide co-treated with beta-Naphthoflavone] results in decreased expression of SERPINA7 mRNA	19737545
5318517	C030419	andrographolide	SLC1A4	6509	Mus musculus	10090	[andrographolide co-treated with beta-Naphthoflavone] results in increased expression of SLC1A4 mRNA|andrographolide results in increased expression of SLC1A4 mRNA	19737545
5318517	C030419	andrographolide	SLC7A11	23657	Mus musculus	10090	andrographolide results in increased expression of SLC7A11 mRNA	19737545
5318517	C030419	andrographolide	SMAD2	4087	Mus musculus	10090	andrographolide inhibits the reaction [TGFB1 protein results in increased phosphorylation of SMAD2 protein]	31706003
5318517	C030419	andrographolide	SMAD3	4088	Mus musculus	10090	andrographolide inhibits the reaction [TGFB1 protein results in increased phosphorylation of SMAD3 protein]	31706003
5318517	C030419	andrographolide	SOD1	6647	Rattus norvegicus	10116	andrographolide results in increased expression of SOD1 protein|andrographolide results in increased expression of SOD1 mRNA	25110055
5318517	C030419	andrographolide	SPP1	6696	Mus musculus	10090	[andrographolide co-treated with beta-Naphthoflavone] results in decreased expression of SPP1 mRNA	19737545
5318517	C030419	andrographolide	SQSTM1	8878	Homo sapiens	9606	andrographolide results in increased expression of SQSTM1 protein	29355602
5318517	C030419	andrographolide	SRXN1	140809	Mus musculus	10090	andrographolide results in increased expression of SRXN1 mRNA|[andrographolide co-treated with beta-Naphthoflavone] results in increased expression of SRXN1 mRNA	19737545
5318517	C030419	andrographolide	STAT3	6774	Homo sapiens	9606	andrographolide inhibits the reaction [Tobacco Smoke Pollution results in increased phosphorylation of STAT3 protein]|IL6 protein promotes the reaction [andrographolide inhibits the reaction [Tobacco Smoke Pollution results in increased phosphorylation of STAT3 protein]]	31128153
5318517	C030419	andrographolide	STAT3	6774	Homo sapiens	9606	andrographolide results in decreased activity of STAT3 protein	23845849
5318517	C030419	andrographolide	STEAP4	79689	Mus musculus	10090	[andrographolide co-treated with beta-Naphthoflavone] results in decreased expression of STEAP4 mRNA	19737545
5318517	C030419	andrographolide	STH	246744	Mus musculus	10090	andrographolide results in increased expression of STH mRNA	19737545
5318517	C030419	andrographolide	SVS3B	329557	Mus musculus	10090	[andrographolide co-treated with beta-Naphthoflavone] results in increased expression of SVS3B mRNA	19737545
5318517	C030419	andrographolide	TAS2R50	259296	Homo sapiens	9606	andrographolide binds to and results in increased activity of TAS2R50 protein	19817411
5318517	C030419	andrographolide	TDO2	6999	Mus musculus	10090	[andrographolide co-treated with beta-Naphthoflavone] results in increased expression of TDO2 mRNA|andrographolide results in increased expression of TDO2 mRNA	19737545
5318517	C030419	andrographolide	TGFB1	7040	Homo sapiens	9606	TGFB1 protein inhibits the reaction [andrographolide results in increased expression of EGLN1 protein]|andrographolide results in decreased expression of TGFB1 protein|TGFB1 protein inhibits the reaction [andrographolide results in increased expression of EGLN1 mRNA]	21134392
5318517	C030419	andrographolide	TGFB1	7040	Mus musculus	10090	andrographolide inhibits the reaction [TGFB1 protein results in increased expression of ACTA2 mRNA]|andrographolide inhibits the reaction [TGFB1 protein results in increased expression of MMP2 mRNA]|andrographolide inhibits the reaction [TGFB1 protein results in increased phosphorylation of MAPK3 protein]|andrographolide inhibits the reaction [TGFB1 protein results in increased expression of ACTA…	31706003
5318517	C030419	andrographolide	THBS1	7057	Mus musculus	10090	[andrographolide co-treated with beta-Naphthoflavone] results in decreased expression of THBS1 mRNA|andrographolide results in decreased expression of THBS1 mRNA	19737545
5318517	C030419	andrographolide	TIMP1	7076	Mus musculus	10090	andrographolide inhibits the reaction [TGFB1 protein results in increased expression of TIMP1 mRNA]	31706003
5318517	C030419	andrographolide	TMPRSS11F	389208	Mus musculus	10090	[andrographolide co-treated with beta-Naphthoflavone] results in increased expression of TMPRSS11F mRNA	19737545
5318517	C030419	andrographolide	TNF	7124	Rattus norvegicus	10116	andrographolide inhibits the reaction [Copper Sulfate results in increased expression of TNF protein]	20946909
5318517	C030419	andrographolide	TNF	7124	Rattus norvegicus	10116	andrographolide inhibits the reaction [Freund's Adjuvant results in increased expression of TNF protein]	32061742
5318517	C030419	andrographolide	TP53	7157	Homo sapiens	9606	andrographolide results in increased expression of and results in increased phosphorylation of TP53 protein	18619950
5318517	C030419	andrographolide	TP53	7157	Homo sapiens	9606	andrographolide results in increased expression of TP53|Fluorouracil promotes the reaction [andrographolide results in increased expression of TP53]	19097688
5318517	C030419	andrographolide	UGT1A6	54578	Mus musculus	10090	[andrographolide co-treated with beta-Naphthoflavone] results in increased expression of UGT1A6 mRNA|andrographolide results in increased expression of UGT1A6 mRNA	19737545
5318517	C030419	andrographolide	UGT2B35	243085	Mus musculus	10090	[andrographolide co-treated with beta-Naphthoflavone] results in increased expression of UGT2B35 mRNA|andrographolide results in increased expression of UGT2B35 mRNA	19737545
5318517	C030419	andrographolide	UGT2B5	22238	Mus musculus	10090	[andrographolide co-treated with beta-Naphthoflavone] results in increased expression of UGT2B5 mRNA	19737545
5318517	C030419	andrographolide	VCAM1	7412	Mus musculus	10090	[andrographolide co-treated with beta-Naphthoflavone] results in decreased expression of VCAM1 mRNA	19737545
5318517	C030419	andrographolide	VEGFA	7422	Homo sapiens	9606	andrographolide inhibits the reaction [VEGFA protein results in increased phosphorylation of KDR protein]|andrographolide inhibits the reaction [VEGFA protein results in increased phosphorylation of MAP2K6 protein]|andrographolide inhibits the reaction [VEGFA protein results in increased phosphorylation of RAF1 protein]|andrographolide inhibits the reaction [VEGFA protein results in increased pho…	24814888
5318517	C030419	andrographolide	VEGFA	7422	Homo sapiens	9606	andrographolide inhibits the reaction [HIF1A protein binds to VEGFA promoter]|EGLN1 mutant form inhibits the reaction [andrographolide results in decreased expression of VEGFA protein]	21134392
5318517	C030419	andrographolide	VEGFA	7422	Homo sapiens	9606	andrographolide results in decreased expression of VEGFA mRNA|andrographolide results in decreased expression of VEGFA protein	21134392|28651835
5318517	C030419	andrographolide	VEGFA	7422	Homo sapiens	9606	benzyloxycarbonylleucyl-leucyl-leucine aldehyde inhibits the reaction [andrographolide results in decreased expression of VEGFA mRNA]|benzyloxycarbonylleucyl-leucyl-leucine aldehyde inhibits the reaction [andrographolide results in decreased expression of VEGFA protein]|pyrazolanthrone inhibits the reaction [andrographolide results in decreased expression of VEGFA mRNA]|pyrazolanthrone inhibits t…	28651835
5318517	C030419	andrographolide	VIL1	7429	Mus musculus	10090	[andrographolide co-treated with beta-Naphthoflavone] results in decreased expression of VIL1 mRNA	19737545
5318517	C030419	andrographolide	VIM	7431	Homo sapiens	9606	andrographolide inhibits the reaction [Tobacco Smoke Pollution results in increased expression of VIM protein]|IL6 protein promotes the reaction [andrographolide inhibits the reaction [Tobacco Smoke Pollution results in increased expression of VIM protein]]	31128153
5318517	C030419	andrographolide	VIM	7431	Mus musculus	10090	[andrographolide co-treated with beta-Naphthoflavone] results in decreased expression of VIM mRNA	19737545
5318517	C030419	andrographolide	XIAP	331	Homo sapiens	9606	andrographolide results in decreased expression of XIAP protein	23845849

## Sheet: Table S2
Table SII. KEGG pathway analysis of andrographolide targets with the Cytoscape JEPPETO plugin.
Pathways or Progress	XD score	q value
Metabolism of xenobiotics by cytochrome P450	1.17766	0
Retinol metabolism	1.11099	0.00092
Bladder cancer	1.06713	0
Drug metabolism - cytochrome P450	0.95413	0.00029
Colorectal cancer	0.90881	0
Glutathione metabolism	0.7392	0.00205
Amyotrophic lateral sclerosis (ALS)	0.73511	0
Tryptophan metabolism	0.70074	0.00023
p53 signaling pathway	0.69701	0
Thyroid cancer	0.61766	0.01342
Pancreatic cancer	0.59195	0
Steroid hormone biosynthesis	0.57766	0.02256
Endometrial cancer	0.51766	0.00019
Linoleic acid metabolism	0.50493	0.09366
Prostate cancer	0.40993	1e-05
Glioma	0.39433	0.00054
Chronic myeloid leukemia	0.37186	0.00024
Prion diseases	0.34909	0.00687
Non-small cell lung cancer	0.34629	0.00651
Apoptosis	0.33459	0.00019
Small cell lung cancer	0.32644	0.00019
Melanoma	0.30992	0.00355
Renal cell carcinoma	0.30707	0.00023
Chagas disease	0.30291	1e-05
Pathways in cancer	0.29447	0
Cell cycle	0.28599	1e-05
Toll-like receptor signaling pathway	0.26655	8e-05
Graft-versus-host disease	0.25766	0.0771
Malaria	0.25385	0.0144
NOD-like receptor signaling pathway	0.25224	0.00271
Tyrosine metabolism	0.24825	0.18191
Arachidonic acid metabolism	0.2392	0.083
Neurotrophin signaling pathway	0.18262	0.00076
Dorso-ventral axis formation	0.17766	0.23883
VEGF signaling pathway	0.16476	0.01543
GnRH signaling pathway	0.1632	0.00401
ErbB signaling pathway	0.15861	0.00419
Fc epsilon RI signaling pathway	0.14689	0.01904
Focal adhesion	0.1446	1e-05
Viral myocarditis	0.13292	0.04336
B cell receptor signaling pathway	0.12549	0.02426
mTOR signaling pathway	0.10419	0.09412
Leishmaniasis	0.10024	0.05819
Allograft rejection	0.09766	0.34426
T cell receptor signaling pathway	0.09139	0.01342
ECM-receptor interaction	0.08935	0.03923
TGF-beta signaling pathway	0.08146	0.04321
MAPK signaling pathway	0.0738	0.00061
Basal cell carcinoma	0.07311	0.6578
Adherens junction	0.06695	0.08455
Amoebiasis	0.06337	0.03458
Type I diabetes mellitus	0.05352	0.42088
Natural killer cell mediated cytotoxicity	0.03692	0.05226
Wnt signaling pathway	0.03547	0.10033
Porphyrin and chlorophyll metabolism	0.0346	0.18191
Progesterone-mediated oocyte maturation	0.03082	0.1212
Autoimmune thyroid disease	0.02766	0.4593
Huntington's disease	0.02598	0.083
Melanogenesis	0.02156	0.13645
Alzheimer's disease	0.01035	0.05819
Acute myeloid leukemia	0.00843	0.35612
Intestinal immune network for IgA production	-0.00012	0.52666
Long-term depression	-0.01181	0.42088
Aldosterone-regulated sodium reabsorption	-0.01181	0.5588
Epithelial cell signaling in Helicobacter pylori infection	-0.01895	0.4334
Cytosolic DNA-sensing pathway	-0.02234	0.59006
Long-term potentiation	-0.03186	0.47304
Alanine, aspartate and glutamate metabolism	-0.03186	0.85751
Chemokine signaling pathway	-0.03411	0.14041
Type II diabetes mellitus	-0.03629	0.64559
Vascular smooth muscle contraction	-0.04257	0.43166
Cytokine-cytokine receptor interaction	-0.04377	0.11777
Mismatch repair	-0.04843	0.8864
Oocyte meiosis	-0.05095	0.46584
Insulin signaling pathway	-0.05974	0.4334
Fatty acid metabolism	-0.06849	0.93711
Gap junction	-0.07234	0.67857
Shigellosis	-0.07502	0.84832
Fc gamma R-mediated phagocytosis	-0.076	0.69968
RIG-I-like receptor signaling pathway	-0.07689	0.84832
Peroxisome	-0.0775	0.84832
Protein processing in endoplasmic reticulum	-0.07766	0.5588
Bacterial invasion of epithelial cells	-0.09343	0.91465
Base excision repair	-0.09734	1
Leukocyte transendothelial migration	-0.09734	0.86135
DNA replication	-0.10113	1
Jak-STAT signaling pathway	-0.10294	0.84842
Cell adhesion molecules (CAMs)	-0.10696	0.91465
Hypertrophic cardiomyopathy (HCM)	-0.10776	1
Endocytosis	-0.10998	0.86135
Axon guidance	-0.11423	0.97444
PPAR signaling pathway	-0.11978	1
Nucleotide excision repair	-0.1271	1
Glycolysis / Gluconeogenesis	-0.1271	1
Notch signaling pathway	-0.1271	1
Hedgehog signaling pathway	-0.13143	1
Pathogenic Escherichia coli infection	-0.13191	1
Metabolic pathways	-0.13328	1
Regulation of actin cytoskeleton	-0.13544	1
Parkinson's disease	-0.14153	1
Phagosome	-0.15122	1
Adipocytokine signaling pathway	-0.15216	1
Arrhythmogenic right ventricular cardiomyopathy (ARVC)	-0.15379	1
Ubiquitin mediated proteolysis	-0.15418	1
Systemic lupus erythematosus	-0.16264	1
Dilated cardiomyopathy	-0.16715	1
Hematopoietic cell lineage	-0.17234	1
Tight junction	-0.18473	1
Vibrio cholerae infection	-0.21639	1
Gastric acid secretion	-0.21837	1
Drug metabolism - other enzymes	-0.22234	1
Purine metabolism	-0.22234	1
Primary immunodeficiency	-0.22234	1
Amino sugar and nucleotide sugar metabolism	-0.22234	1
Oxidative phosphorylation	-0.22234	1
Cardiac muscle contraction	-0.22234	1
Proteasome	-0.22234	1
Antigen processing and presentation	-0.22234	1
Asthma	-0.22234	1
Glycerophospholipid metabolism	-0.22234	1
Ether lipid metabolism	-0.22234	1
Glycosylphosphatidylinositol(GPI)-anchor biosynthesis	-0.22234	1
Lysosome	-0.22234	1
Aminoacyl-tRNA biosynthesis	-0.22234	1
ABC transporters	-0.22234	1
Spliceosome	-0.22234	1
Homologous recombination	-0.22234	1
Non-homologous end-joining	-0.22234	1
Nicotinate and nicotinamide metabolism	-0.22234	1
Lysine degradation	-0.22234	1
Neuroactive ligand-receptor interaction	-0.22234	1
N-Glycan biosynthesis	-0.22234	1
RNA degradation	-0.22234	1
Pyrimidine metabolism	-0.22234	1
SNARE interactions in vesicular transport	-0.22234	1
Collecting duct acid secretion	-0.22234	1
Glycerolipid metabolism	-0.22234	1
Cysteine and methionine metabolism	-0.22234	1
Phosphatidylinositol signaling system	-0.22234	1
Inositol phosphate metabolism	-0.22234	1
Valine, leucine and isoleucine degradation	-0.22234	1
Vasopressin-regulated water reabsorption	-0.22234	1
Regulation of autophagy	-0.22234	1
Sphingolipid metabolism	-0.22234	1
One carbon pool by folate	-0.22234	1
RNA polymerase	-0.22234	1
Basal transcription factors	-0.22234	1
Calcium signaling pathway	-0.22234	1
Salivary secretion	-0.22234	1
Starch and sucrose metabolism	-0.22234	1
Complement and coagulation cascades	-0.22234	1
Selenoamino acid metabolism	-0.22234	1
Glyoxylate and dicarboxylate metabolism	-0.22234	1
Olfactory transduction	-0.22234	1
Other glycan degradation	-0.22234	1
Pyruvate metabolism	-0.22234	1
Protein export	-0.22234	1
Biosynthesis of unsaturated fatty acids	-0.22234	1
Proximal tubule bicarbonate reclamation	-0.22234	1
Glycine, serine and threonine metabolism	-0.22234	1
Taste transduction	-0.22234	1
Ribosome	-0.22234	1
O-Glycan biosynthesis	-0.22234	1
Nitrogen metabolism	-0.22234	1
Arginine and proline metabolism	-0.22234	1
Butanoate metabolism	-0.22234	1
Renin-angiotensin system	-0.22234	1
Phototransduction	-0.22234	1
Circadian rhythm - mammal	-0.22234	1
Citrate cycle (TCA cycle)	-0.22234	1
Propanoate metabolism	-0.22234	1
Maturity onset diabetes of the young	-0.22234	1
beta-Alanine metabolism	-0.22234	1
Fructose and mannose metabolism	-0.22234	1
Pentose phosphate pathway	-0.22234	1
Galactose metabolism	-0.22234	1
Riboflavin metabolism	-0.22234	1

## Sheet: Table S3
Table SIII. BioCarta pathway analysis of andrographolide targets with the Cytoscape JEPPETO plugin.
Pathways or Progress	XD score	q value
p53 Signaling Pathway	2.28474	0
Cell Cycle: G1/S Check Point	1.28706	0
RB Tumor Suppressor/Checkpoint Signaling in response to DNA damage	1.22225	0.02316
BTG family proteins and cell cycle regulation	1.17225	0.06604
Stress Induction of HSP Regulation	1.01071	0.00645
Role of Mitochondria in Apoptotic Signaling	0.94593	0.00082
Apoptotic Signaling in Response to DNA Damage	0.92225	0.0066
Influence of Ras and Rho proteins on G1 to S Transition	0.91225	9e-05
Cadmium induces DNA synthesis and proliferation in macrophages	0.90082	0.0074
IL 6 signaling pathway	0.87225	0.00103
Oxidative Stress Induced Gene Expression Via Nrf2	0.80558	0.00041
Ceramide Signaling Pathway	0.80558	0.0013
D4-GDI Signaling Pathway	0.80558	0.02316
Regulation of transcriptional activity by PML	0.78475	0.05133
TGF beta signaling pathway	0.72225	0.01209
B Cell Survival Pathway	0.70301	0.0281
Inhibition of Matrix Metalloproteinases	0.67225	0.06604
E2F1 Destruction Pathway	0.67225	0.06604
Keratinocyte Differentiation	0.63014	9e-05
Human Cytomegalovirus and Map Kinase Pathways	0.6151	0.035
Downregulated of MTA-3 in ER-negative Breast Tumors	0.56315	0.08316
Tumor Suppressor Arf Inhibits Ribosomal Biogenesis	0.55558	0.30303
Hypoxia-Inducible Factor in the Cardiovascular System	0.53891	0.04422
Cyclins and Cell Cycle Regulation	0.51572	0.0112
Hypoxia and p53 in the Cardiovascular system	0.47225	0.05133
TPO Signaling Pathway	0.47225	0.02428
Phosphorylation of MEK1 by cdk5/p35 down regulates the MAP kinase pathway	0.47225	0.09728
FAS signaling pathway ( CD95 )	0.47225	0.0066
Inhibition of Cellular Proliferation by Gleevec	0.47225	0.02428
PDGF Signaling Pathway	0.43225	0.01596
Nerve growth factor pathway (NGF)	0.41342	0.05863
EGF Signaling Pathway	0.39532	0.0188
Regulation of p27 Phosphorylation during Cell Cycle Progression	0.39532	0.11183
Role of ERBB2 in Signal Transduction and Oncology	0.38134	0.035
Fc Epsilon Receptor I Signaling in Mast Cells	0.37547	0.01108
ATM Signaling Pathway	0.36698	0.21495
Regulation of BAD phosphorylation	0.36113	0.06604
Angiotensin II mediated activation of JNK Pathway via Pyk2 dependent signaling	0.32939	0.02316
Pertussis toxin-insensitive CCR5 Signaling in Macrophage	0.32939	0.12673
Role of ?-arrestins in the activation and targeting of MAP kinases	0.32939	0.12673
Telomeres, Telomerase, Cellular Aging, and Immortality	0.32225	0.23681
EPO Signaling Pathway	0.31435	0.07496
Induction of apoptosis through DR3 and DR4/5 Death Receptors	0.27225	0.05133
IGF-1 Signaling Pathway	0.27225	0.08578
IL 3 signaling pathway	0.27225	0.14647
HIV-I Nef: negative effector of Fas and TNF	0.26146	0.00405
Links between Pyk2 and Map Kinases	0.24148	0.05863
Caspase Cascade in Apoptosis	0.23415	0.09722
Insulin Signaling Pathway	0.23415	0.09722
Role of EGF Receptor Transactivation by GPCRs in Cardiac Hypertrophy	0.22225	0.15977
Sprouty regulation of tyrosine kinase signals	0.22225	0.15977
VEGF, Hypoxia, and Angiogenesis	0.22225	0.15977
TNFR1 Signaling Pathway	0.21299	0.06513
Erythropoietin mediated neuroprotection through NF-kB	0.19952	0.2806
Signaling Pathway from G-Protein Families	0.19952	0.10692
IL 2 signaling pathway	0.19952	0.10692
The 4-1BB-dependent immune response	0.17813	0.18086
IL-2 Receptor Beta Chain in T cell Activation	0.15796	0.05133
CTCF: First Multivalent Nuclear Factor	0.15646	0.52427
Chaperones modulate interferon Signaling Pathway	0.15646	0.52427
Bystander B Cell Activation	0.13891	0.30303
Role of MAL in Rho-Mediated Activation of SRF	0.13891	0.20255
Prion Pathway	0.13891	0.30303
PTEN dependent cell cycle arrest and apoptosis	0.13891	0.20255
HIV Induced T Cell Apoptosis	0.13891	0.30303
fMLP induced chemokine gene expression in HMC-1 cells	0.11225	0.14298
Roles of ?-arrestin-dependent Recruitment of Src Kinases in GPCR Signaling	0.10382	0.21495
Multiple antiapoptotic pathways from IGF-1R signaling lead to BAD phosphorylation	0.10382	0.21495
Aspirin Blocks Signaling Pathway Involved in Platelet Activation	0.10382	0.21495
Erythrocyte Differentiation Pathway	0.08763	0.33801
Signal transduction through IL1R	0.08763	0.15391
The PRC2 Complex Sets Long-term Gene Silencing Through Modification of Histone Tails	0.08763	0.33801
p38 MAPK Signaling Pathway	0.07831	0.10939
BCR Signaling Pathway	0.06484	0.16234
Signaling of Hepatocyte Growth Factor Receptor	0.06048	0.11823
Erk and PI-3 Kinase Are Necessary for Collagen Binding in Corneal Epithelia	0.04367	0.25204
Role of Erk5 in Neuronal Survival	0.04367	0.37482
NFAT and Hypertrophy of the heart (Transcription in the broken heart)	0.04367	0.12673
Nuclear Receptors in Lipid Metabolism and Toxicity	0.04367	0.25204
Ras Signaling Pathway	0.04367	0.25204
Cell Cycle: G2/M Checkpoint	0.03746	0.64413
MAPKinase Signaling Pathway	0.02921	0.01984
CCR3 signaling in Eosinophils	0.0177	0.27044
CXCR4 Signaling Pathway	0.0177	0.27044
Trefoil Factors Initiate Mucosal Healing	0.0177	0.27044
T Cell Receptor Signaling Pathway	0.01279	0.14647
Cells and Molecules involved in local acute inflammatory response	0.00558	0.39839
CTL mediated immune response against target cells	0.00558	0.39839
Erk1/Erk2 Mapk Signaling pathway	0.00558	0.21154
Actions of Nitric Oxide in the Heart	0.00558	0.39839
Multi-step Regulation of Transcription by Pitx2	0.00558	0.39839
Antigen Dependent B Cell Activation	-0.02775	0.42681
METS affect on Macrophage Differentiation	-0.02775	0.42681
TNF/Stress Related Signaling	-0.02775	0.30303
Role of Tob in T-cell activation	-0.02775	0.42681
Toll-Like Receptor Pathway	-0.02775	0.23681
WNT Signaling Pathway	-0.02775	0.30303
Integrin Signaling Pathway	-0.03954	0.25204
Role of BRCA1, BRCA2 and ATR in Cancer Susceptibility	-0.05407	0.97585
Agrin in Postsynaptic Differentiation	-0.08331	0.37482
Transcription factor CREB and its extracellular signals	-0.1067	0.52427
Effects of calcineurin in Keratinocyte Differentiation	-0.12775	0.75298
Regulation of eIF4e and p70 S6 Kinase	-0.12775	0.5585
Sonic Hedgehog (Shh) Pathway	-0.12775	0.75298
Bioactive Peptide Induced Signaling Pathway	-0.14066	0.45731
AKT Signaling Pathway	-0.1468	0.59198
ALK in cardiac myocytes	-0.15275	0.48185
IL12 and Stat4 Dependent Signaling Pathway in Th1 Development	-0.16412	0.62463
Sumoylation by RanBP2 Regulates Transcriptional Repression	-0.16412	0.79555
Phospholipids as signalling intermediaries	-0.17993	0.64413
NFkB activation by Nontypeable Hemophilus influenzae	-0.17993	0.64413
Regulation of eIF2	-0.19442	0.81128
Segmentation Clock	-0.19442	0.81128
Adhesion and Diapedesis of Lymphocytes	-0.19442	0.81128
Role of MEF2D in T-cell Apoptosis	-0.19442	0.81128
Growth Hormone Signaling Pathway	-0.20775	0.70391
The IGF-1 Receptor and Longevity	-0.22006	0.84382
Bone Remodelling	-0.22006	0.84382
Inactivation of Gsk3 by AKT causes accumulation of b-catenin in Alveolar Macrophages	-0.23146	0.75298
Mechanism of Gene Regulation by Peroxisome Proliferators via PPARa(alpha)	-0.23507	0.68362
Role of nicotinic acetylcholine receptors in the regulation of apoptosis	-0.24204	0.85883
IL 5 Signaling Pathway	-0.24204	0.85883
IL-7 Signal Transduction	-0.24204	0.85883
Presenilin action in Notch and Wnt signaling	-0.24204	0.85883
Cytokines and Inflammatory Response	-0.26109	0.81128
Regulation of hematopoiesis by cytokines	-0.26109	0.89164
Thrombin signaling and protease-activated receptors	-0.27775	0.9146
IL 17 Signaling Pathway	-0.27775	0.9146
Ras-Independent pathway in NK cell-mediated cytotoxicity	-0.29246	0.94222
Control of skeletal myogenesis by HDAC & calcium/calmodulin-dependent kinase (CaMK)	-0.30553	0.9676
Cytokine Network	-0.31723	0.97585
Phosphoinositides and their downstream targets.	-0.31723	0.97585
Skeletal muscle hypertrophy is regulated via AKT/mTOR pathway	-0.32775	0.98951
How Progesterone Initiates the Oocyte Maturation	-0.32775	0.98951
CARM1 and Regulation of the Estrogen Receptor	-0.33728	1
Control of Gene Expression by Vitamin D Receptor	-0.36109	1
Selective expression of chemokine receptors during T-cell polarization	-0.37391	1
Chromatin Remodeling by hSWI/SNF ATP-dependent Complexes	-0.51387	1
uCalpain and friends in Cell spread	-0.5185	1
mCalpain and friends in Cell motility	-0.52035	1
Activation of Csk by cAMP-dependent Protein Kinase Inhibits Signaling through the T Cell Receptor	-0.52775	1
GATA3 participate in activating the Th2 cytokine genes expression	-0.52775	1
Lissencephaly gene (LIS1) in neuronal migration and development	-0.52775	1
Synaptic Proteins at the Synaptic Junction	-0.52775	1
Acetylation and Deacetylation of RelA in The Nucleus	-0.52775	1
Y branching of actin filaments	-0.52775	1
Hemoglobin's Chaperone	-0.52775	1
AKAP95 role in mitosis and chromosome dynamics	-0.52775	1
Protein Kinase A at the Centrosome	-0.52775	1
Acute Myocardial Infarction	-0.52775	1
ADP-Ribosylation Factor	-0.52775	1
?-arrestins in GPCR Desensitization	-0.52775	1
B Lymphocyte Cell Surface Molecules	-0.52775	1
CBL mediated ligand-induced downregulation of EGF receptors	-0.52775	1
CD40L Signaling Pathway	-0.52775	1
Cell to Cell Adhesion Signaling	-0.52775	1
ChREBP regulation by carbohydrates and cAMP	-0.52775	1
Regulation of ck1/cdk5 by type 1 glutamate receptors	-0.52775	1
Classical Complement Pathway	-0.52775	1
Complement Pathway	-0.52775	1
The Co-Stimulatory Signal During T-cell Activation	-0.52775	1
Dendritic cells in regulating TH1 and TH2 Development	-0.52775	1
Map Kinase Inactivation of SMRT Corepressor	-0.52775	1
Eicosanoid Metabolism	-0.52775	1
The Role of Eosinophils in the Chemokine Network of Allergy	-0.52775	1
Eph Kinases and ephrins support platelet aggregation	-0.52775	1
ER?associated degradation (ERAD) Pathway	-0.52775	1
Extrinsic Prothrombin Activation Pathway	-0.52775	1
Fibrinolysis Pathway	-0.52775	1
Corticosteroids and cardioprotection	-0.52775	1
Ghrelin: Regulation of Food Intake and Energy Homeostasis	-0.52775	1
Glycolysis Pathway	-0.52775	1
Adhesion and Diapedesis of Granulocytes	-0.52775	1
IL 4 signaling pathway	-0.52775	1
Intrinsic Prothrombin Activation Pathway	-0.52775	1
Lectin Induced Complement Pathway	-0.52775	1
mTOR Signaling Pathway	-0.52775	1
Antigen Processing and Presentation	-0.52775	1
Monocyte and its Surface Molecules	-0.52775	1
PKC-catalyzed phosphorylation of inhibitory phosphoprotein of myosin phosphatase	-0.52775	1
NF-kB Signaling Pathway	-0.52775	1
NO2-dependent IL 12 Pathway in NK cells	-0.52775	1
Regulation of PGC-1a	-0.52775	1
Rab GTPases Mark Targets In The Endocytotic Machinery	-0.52775	1
Rac 1 cell motility signaling pathway	-0.52775	1
Role of Ran in mitotic spindle regulation	-0.52775	1
Nuclear receptors coordinate the activities of chromatin remodeling complexes and coactivators to facilitate initiation of transcription in carcinoma cells	-0.52775	1
Rho cell motility signaling pathway	-0.52775	1
Granzyme A mediated Apoptosis Pathway	-0.52775	1
Spliceosomal Assembly	-0.52775	1
Stathmin and breast cancer resistance to antimicrotubule agents	-0.52775	1
TACI and BCMA stimulation of B cell immune responses.	-0.52775	1
Lck and Fyn tyrosine kinases in initiation of TCR Activation	-0.52775	1
T Cytotoxic Cell Surface Molecules	-0.52775	1
Th1/Th2 Differentiation	-0.52775	1
T Helper Cell Surface Molecules	-0.52775	1
TNFR2 Signaling Pathway	-0.52775	1
Trka Receptor Signaling Pathway	-0.52775	1
Neuropeptides VIP and PACAP inhibit the apoptosis of activated T cells	-0.52775	1
